# Supplementary material for: Fasting Concentrations and Postprandial Response of 1,2-Dicarbonyl Compounds 3-Deoxyglucosone, Glyoxal, and Methylglyoxal Are Not Increased in Healthy Older Adults
Source: PubMed Central journal article supplement — J Gerontol A Biol Sci Med Sci. 2021 Nov 2;77(5):934–40. doi: 10.1093/gerona/glab331 (PMC9071428; doi:10.1093/gerona/glab331), 2021-11-02
Supplement: glab331_suppl_supplementary_table_s1.pdf [file glab331_suppl_supplementary_table_s1.pdf]

**eTable 1:** Participant characteristics of oral dextrose challenge

|                               | <b>YW</b> | <b>OW</b> | <b>p-value</b> | <b>YM</b> | <b>OM</b> | <b>p-value</b> |
|-------------------------------|-----------|-----------|----------------|-----------|-----------|----------------|
| <b>n</b>                      | 10        | 14        |                | 5         | 5         |                |
| <b>Age [years]</b>            | 26.2±4.16 | 72.9±6.65 |                | 28.5±2.58 | 75.4±6.18 |                |
| <b>BMI [kg/m<sup>2</sup>]</b> | 21.5±3.07 | 24.1±3.39 | 0.077          | 25.3±5.48 | 29.4±3.44 | 0.195          |
| <b>HOMA-IR</b>                | 1.88±0.60 | 2.44±1.01 | 0.137          | 2.11±0.75 | 3.99±1.14 | 0.015          |
| <b>PC [nmol/mg]</b>           | 1.10±0.38 | 1.16±0.23 | 0.672          | 1.15±0.23 | 0.88±0.12 | 0.053          |
| <b>3-NT [pmol/mg]</b>         | 2.17±1.73 | 2.55±2.20 | 0.655          | 2.74±2.37 | 2.01±1.75 | 0.597          |
| <b>MDA [μmol/L]</b>           | 0.77±0.33 | 0.92±0.37 | 0.340          | 0.71±0.41 | 0.82±0.15 | 0.575          |
| <b>Glucose [mmol/L]</b>       | 4.36±0.40 | 5.07±0.54 | 0.002          | 4.77±0.42 | 5.74±0.54 | 0.012          |
| <b>Insulin [μIU/mL]</b>       | 9.61±2.49 | 10.7±3.72 | 0.435          | 9.78±2.76 | 15.5±3.74 | 0.025          |

*Note.* All data are shown as mean±SD. Age differences were calculated using Student's t-test. YW=younger women, OW=older women, YM=younger men, OM=older men BMI=body mass index, HOMA-IR=homeostasis model assessment–insulin resistance, PC=protein carbonyls, 3-NT=3-Nitrotyrosine, MDA=malondialdehyde.  
p<0.05
